# Supplementary material for: Synthesis of functionalized fluorescent gold nanoclusters for acid phosphatase sensing
Source: Royal Society of Chemistry journal article supplement (doi:10.1039/c5nr04826e), 2015-01-01
Supplement: c5nr04826e1.pdf [file c5nr04826e1.pdf]

## Electronic Supplementary Information (ESI)

# **Synthesis of functionalized fluorescent gold nanoclusters for acid phosphatase sensing**

*Jian Sun, Fan Yang and Xiurong Yang\**

*State Key Laboratory of Electroanalytical Chemistry, Changchun Institute of Applied Chemistry, Chinese Academy of Sciences, Changchun, Jilin 130022, China.*

*\*E-mail: [xryang@ciac.ac.cn](mailto:xryang@ciac.ac.cn); Fax: +86 431 85689278*

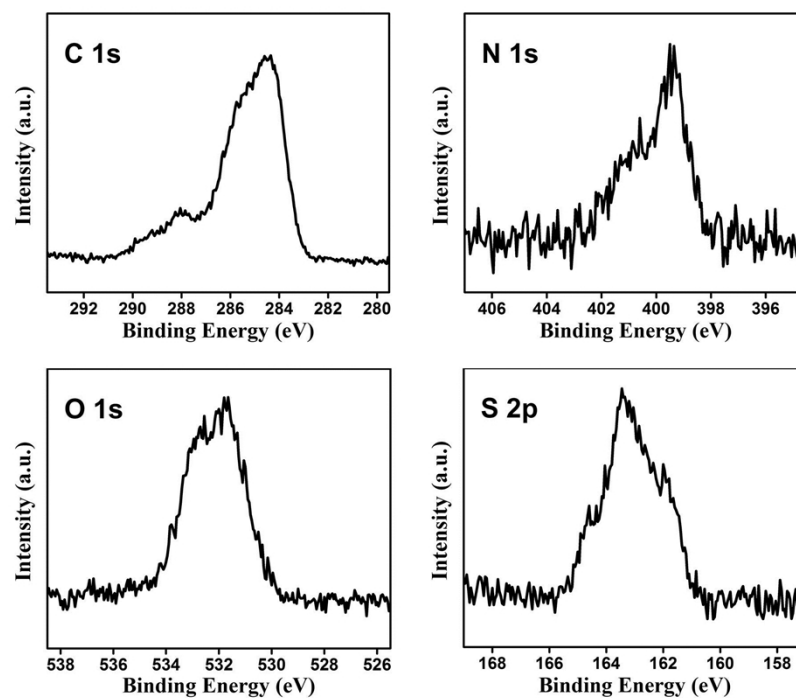

**Fig. S1** XPS spectra of C 1s, N 1s, O 1s, and S 2p for AuNCs@GSH/MUA.

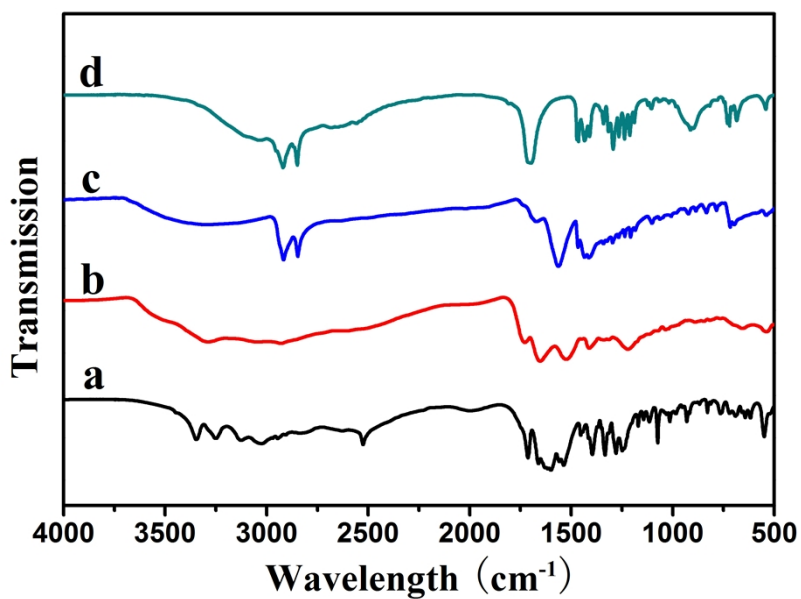

**Fig. S2** FT-IR spectra of pure GSH (a), GSH-Au<sup>+</sup> complex (b), AuNCs@GSH/MUA (c) and pure 11-MUA (d).

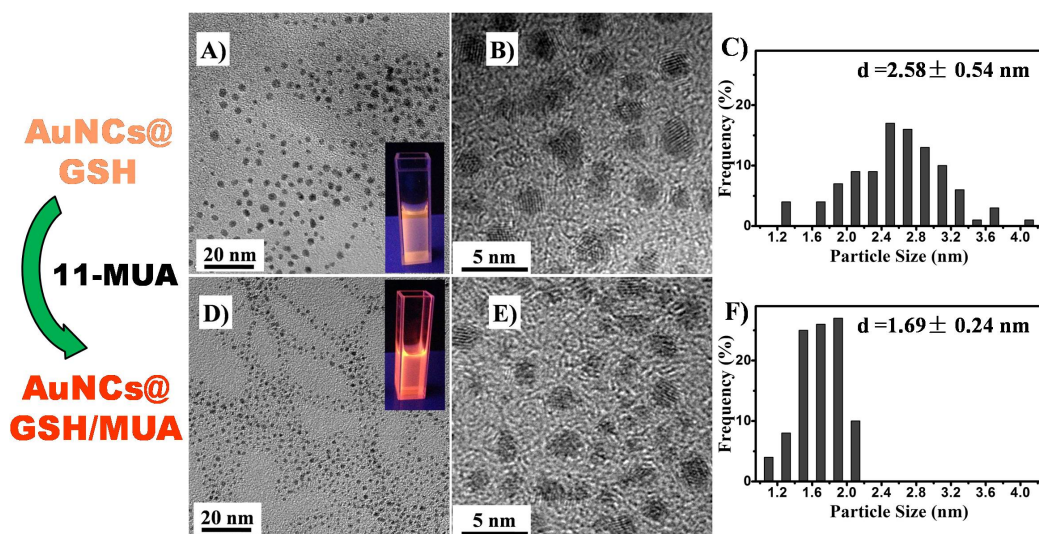

**Fig. S3** Typical TEM images (A, D), HRTEM images (B, E), and size distribution histograms (C, F) of the AuNCs@GSH (A–C) and corresponding AuNCs@GSH/MUA (D–F), respectively. Insets of A and D show the corresponding digital images under the ultraviolet light.

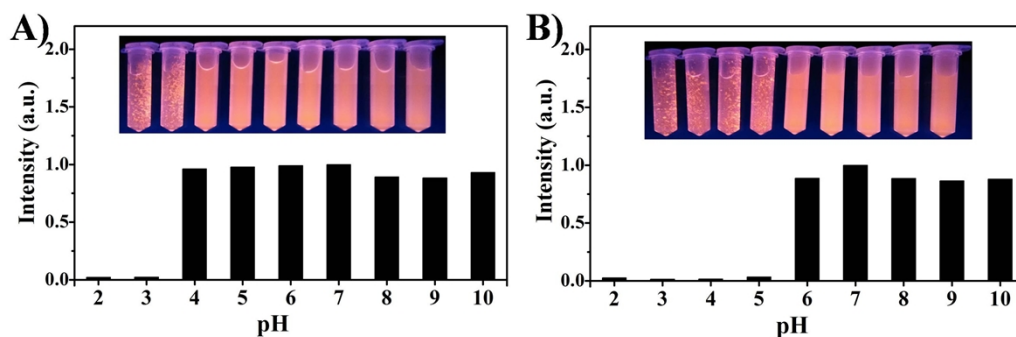

**Fig. S4** The relative fluorescence intensity at 610 nm of the (A) AuNCs@GSH/MUA and (B) AuNCs@MUA measured in the MES buffer at different pHs from 2 to 10. Insets show the corresponding digital images under the ultraviolet light.

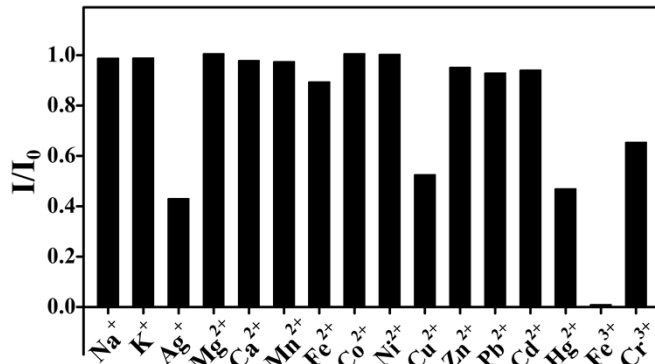

**Fig. S5** Fluorescence intensity ratios ( $I/I_0$  at 610 nm, where  $I$  and  $I_0$  are the fluorescence intensities in the absence and presence of the metal ions, respectively) for the AuNCs@GSH/MUA (2  $\mu\text{M}$ ) measured after the addition of 10  $\mu\text{M}$  various individual metal ions in 5 mM, pH 5.0 MES buffer.

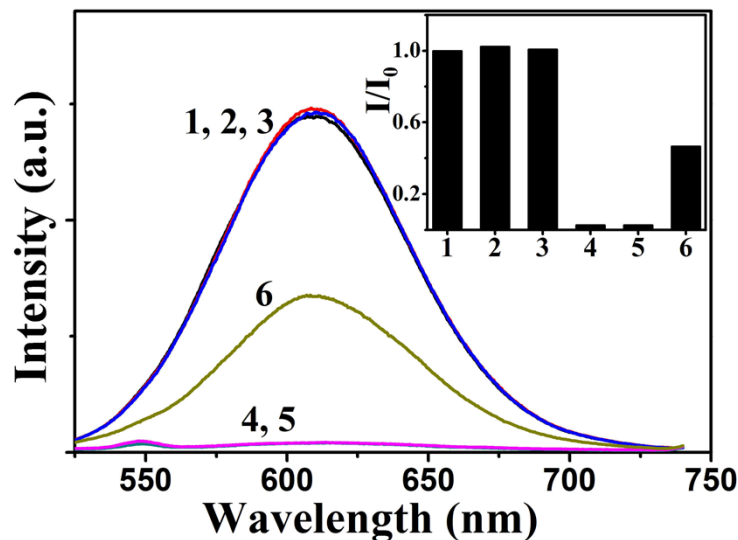

**Fig. S6** Fluorescence spectra and corresponding intensity ratios (inset) of (1) the sole AuNCs@GSH/MUA, (2) AuNCs@GSH/MUA with added GSH, (3) AuNCs@GSH/MUA with added MUA, (4) AuNCs@GSH/MUA- $\text{Fe}^{3+}$  ensemble, (5) AuNCs@GSH/MUA- $\text{Fe}^{3+}$  ensemble with added GSH, and (6) AuNCs@GSH/MUA- $\text{Fe}^{3+}$  ensemble with added MUA.

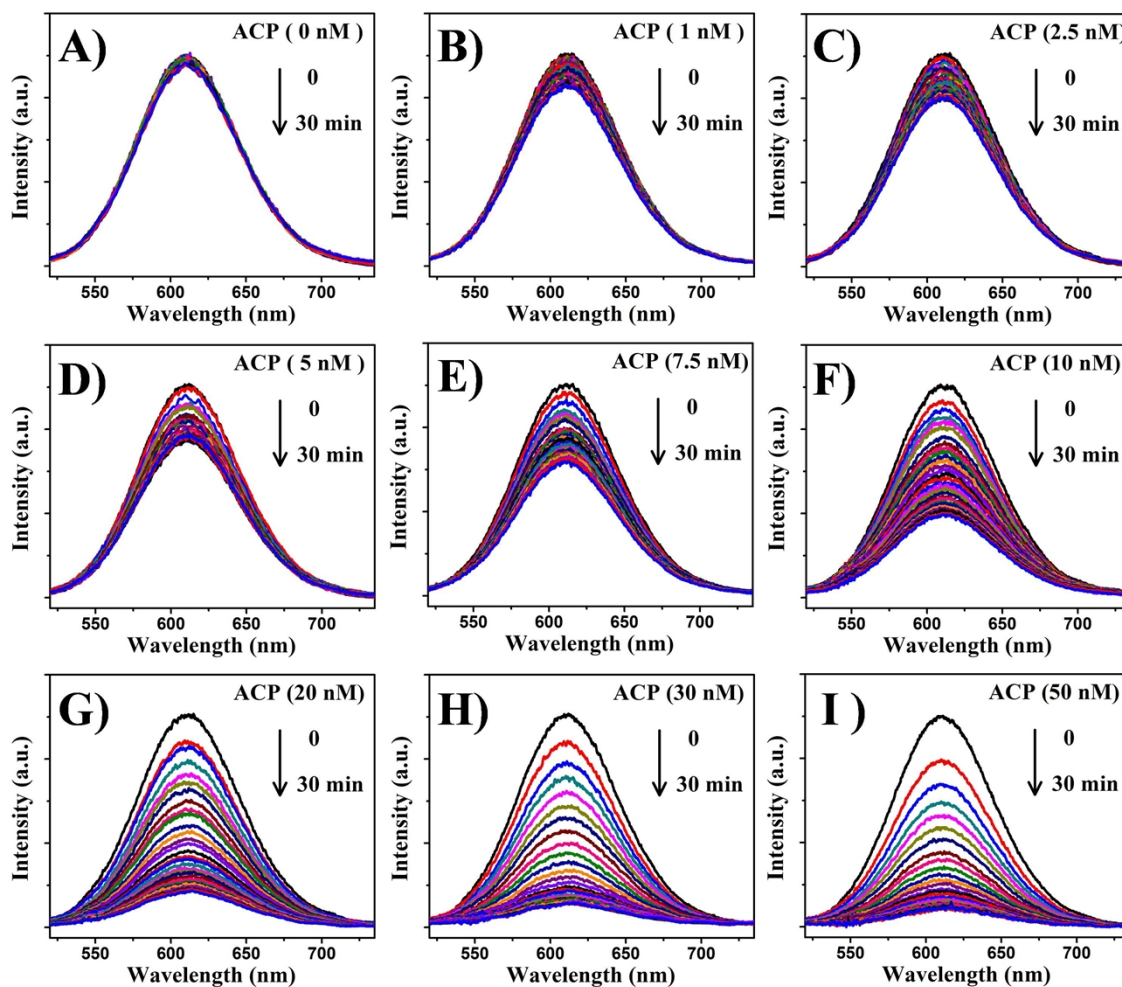

**Fig. S7** Fluorescence emission spectra of the AuNCs@GSH/MUA solution ( $2 \mu\text{M}$ ) in  $5 \text{ mM}$ ,  $\text{pH } 5.0$  MES buffer containing  $\text{Fe}^{3+}$  ( $2 \mu\text{M}$ ) and PPI ( $3 \mu\text{M}$ ) were consecutively recorded every 1 min by adding different concentrations of ACP at  $37 \text{ }^\circ\text{C}$ . The ACP concentrations in the resulting mixtures were  $0 \text{ nM}$  (A),  $1 \text{ nM}$  (B),  $2.5 \text{ nM}$  (C),  $5 \text{ nM}$  (D),  $7.5 \text{ nM}$  (E),  $10 \text{ nM}$  (F),  $20 \text{ nM}$  (G),  $30 \text{ nM}$  (H), and  $50 \text{ nM}$  (I), as indicated in the figure respectively.

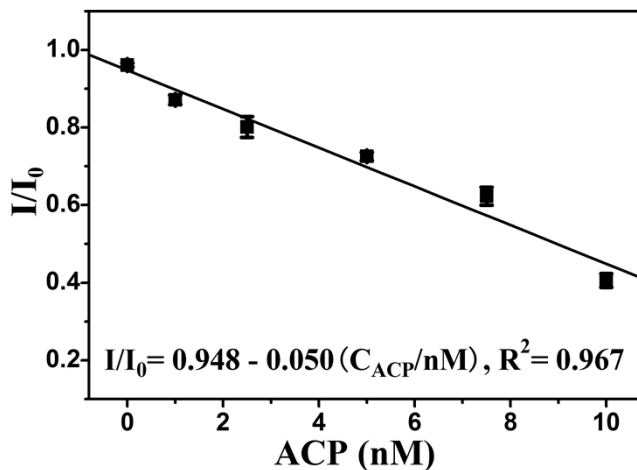

**Fig. S8** Plots of  $I/I_0$  at 610 nm for 30 min as a function of ACP concentrations from 0 to 10 nM.

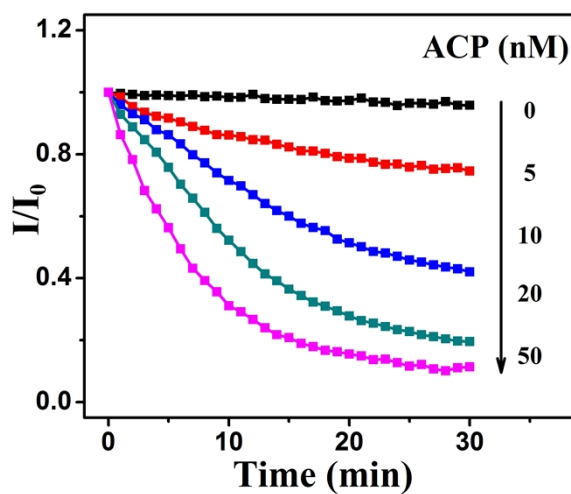

**Fig. S9** Real-time fluorescence ratios ( $I/I_0$  at 610 nm) changes of AuNCs@GSH/MUA- $\text{Fe}^{3+}$ -PPi recorded every 1 min with different concentrations of ACP (0, 5, 10, 20, 50 nM) in cell lysate solution. The cell lysate solution was 2% 3T3L1 cell lysate diluted with MES buffer (5 mM, pH 5.0) containing AuNCs (2  $\mu\text{M}$ ),  $\text{Fe}^{3+}$  (2  $\mu\text{M}$ ) and PPi (3  $\mu\text{M}$ ).
